# Supplementary material
Source: MDPI journal article supplement (https://www.mdpi.com/2076-3417/8/2/270)
Supplement: s1 [file s1]

Supporting Materials: Controlling chemical reactions in confined environments:Water dissociation in MOF-74

Erika M.A. Fuentes-Fernandez 1,†, Stephanie Jensen 2,†, Kui Tan 1, Sebastian Zuluaga 2,
Hao Wang 3, Jing Li 3, Timo Thonhauser 2,4 and Yves J. Chabal 1,*

1 Department of Materials Science and Engineering, University of Texas at Dallas, Richardson, TX 75080, USA; erika.fuentesf@gmail.com (E.M.A.F.-F.); kuitan@utdallas.edu (K.T.)

2 Department of Physics and Center for Functional Materials, Wake Forest University, Winston-Salem, NC 27109, USA; jensensj@wfu.edu (S.J.); sebastian.zuluaga@vanderbilt.edu (S.Z.); thonhauser@wfu.edu (T.T.)

3 Department of Chemistry and Chemical Biology, Rutgers University, Piscataway, NJ 08854, USA; whwhuccms@gmail.com (H.W.); jingli@rutgers.edu (J.L.)

4Department of Chemistry, Massachusetts Institute of Technology, MA 02139, USA

***** Correspondence: chabal@utdallas.edu; Tel.: [972-883-5751](tel:972-883-5751)

† These authors contributed equally to this work.

S1. Materials Used

Zn-MOF-74 [M2(dobdc)], M=Zn2+ and dobdc=2,5-dihydroxybenzenedi-carboxylic acid: A mixture of zinc nitrate hexahydrate (0.24 g, 0.8 mmol), 2, 5-dihydroxyterephthalic (0.08 g, 0.4 mmol), 9 ml DMF and 1 ml H2O were transferred into a 28 ml Teflon-lined autoclave. The autoclave was then sealed and heated to 120 ˚C for 3 days. After filtering and washing with 20 ml DMF, the product was collected. Then the product was exchanged with 20 ml methanol in a glass vial every 2 hs during daytime for 3 days. The crystal structure of Zn-MOF-74 sample was measured by PXRD as shown in Fig. S1(a). The BET surface area reaches 774 m2/g for Zn-MOF-74 as shown in Fig. S1(b). The XRD diffraction pattern and surface area of the sample we studied are in agreement with literature report (Dietzel PDC, et al. *Chemical Communications*, 2008, 5125-5127; Caskey SR, et al. *J Am Chem Soc.* 2008, 130, 10870-10871). Other reagents and solvents were used as received from Sigma-Aldrich: Methanol anhydrous 99.8%, Methanol - d4 99.8 atom % D, Deuterium Oxide, 99.9% D, and 2-propanol, anhydrous, 99.5%.

**Figure S1.** (a) Power X-ray diffraction pattern of Zn-MOF-74 sample (after solvent exchange) with the simulated pattern from single crystal data of Ni-MOF-74 taken from reference (Dietzel PDC, et al. Chemical Communications, 2008, 5125-5127). (b) N2 adsorption in Zn-MOF-74.

S2. Pure methanol (MeOH) and deuterated methanol (MeOD) interaction with Zn-MOF-74

For comparison, pure methanol (MeOH) and pure deuterated methanol (MeOD) were analyzed by loading 8 Torr into the MOF. The temperature was then increased up to 180°C in the absence of any D2O, as shown in Figure S2. For methanol (top), the CH3 asymmetric and symmetric stretches are observed at 2957 cm-1 and 2853 cm-1, and the OH stretch at 3500 cm-1. At room temperature, we observe both the O–H modes associated with H-bonded methanol clusters (3200 cm-1)1 and isolated methanol molecules (3500 cm-1); with increasing temperature, only isolated methanol molecules remain, presumably located at metal centers. At room temperature, the CO stretch is observed at 1033 cm-1 and red shifts to ~1005 cm-1 with increasing temperature (180oC) and time (1h). The same shift is noted for the MeOH/D2O mixture.2 Furthermore, the fact that this contribution, associated with MeOH molecules, disappears upon evacuation but not the 970 cm-1 peak indicates that these features do not arise from the interaction of MeOH or MeOD with the MOF.

For deuterated methanol, a CD3 asymmetric and symmetric stretch are observed at 2226 cm-1 and 2074 cm-1. Just as regular methanol, deuterated methanol also forms H-bonded clusters at room temperature with substantially red-shifted O–D stretches (2400 cm-1) that evolve into isolated molecules at 2800 cm-1 as temperature increases.3

An absorption band observed at 984 cm-1 is assigned to the C–O stretch of MeOD and red shifts to 970 cm-1 as temperature increases.2 The fact that this mode starts at a higher frequency and clearly shifts with temperature suggests that, despite a similar spectral position, it is different from the O–D bending vibration arising from the dissociation of D2O.


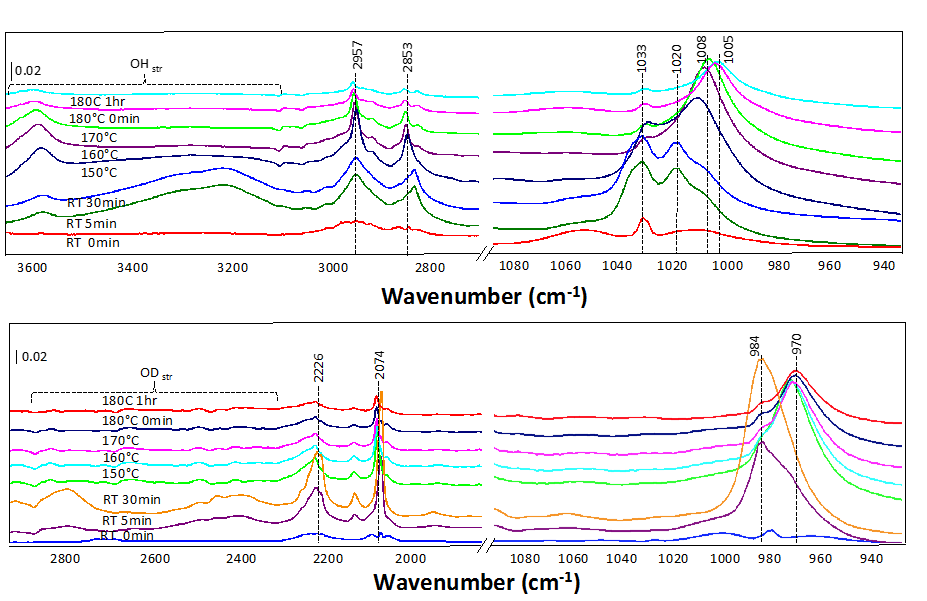


**Figure S2.** Absorbance IR spectrum of (top) methanol only and (bottom) deuterated methanol only interacting with Zn-MOF-74 as a function of temperature and time.

S3. IR spectrum of the gas phase D2O/MeOH

**
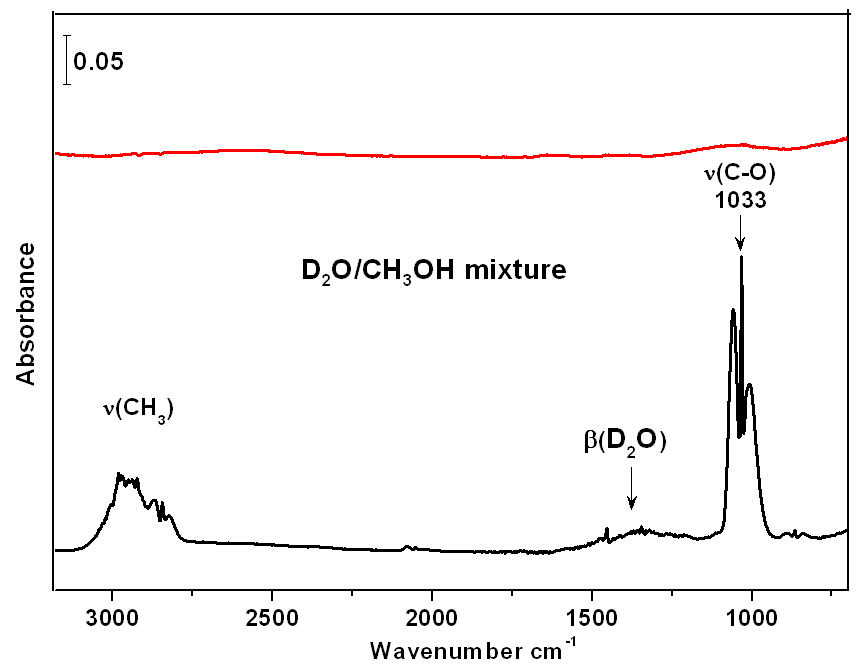
**

**Figure S3.** IR spectra of D2O/CH3OH (8Torr/ 8Torr) mixtures inside the empty cell (black) and upon evacuation within 10 sec (red), referenced to the blank backgrounds in vacuum (< 20 mTorr).

S4. Reaction pathway in the presence of one and four water molecules

The reaction pathways for the single water and four water molecule simulations are depicted in Figure S4. Note that in both cases our simulations indicate that it is more energetically favorable for the MeOD product of the methanol dissociation reaction to dissociate towards the center of the pore as opposed to remaining near the reaction site.

S5. Isopropanol (IPA) and D2O interaction with Zn-MOF-74

A) Four H2O


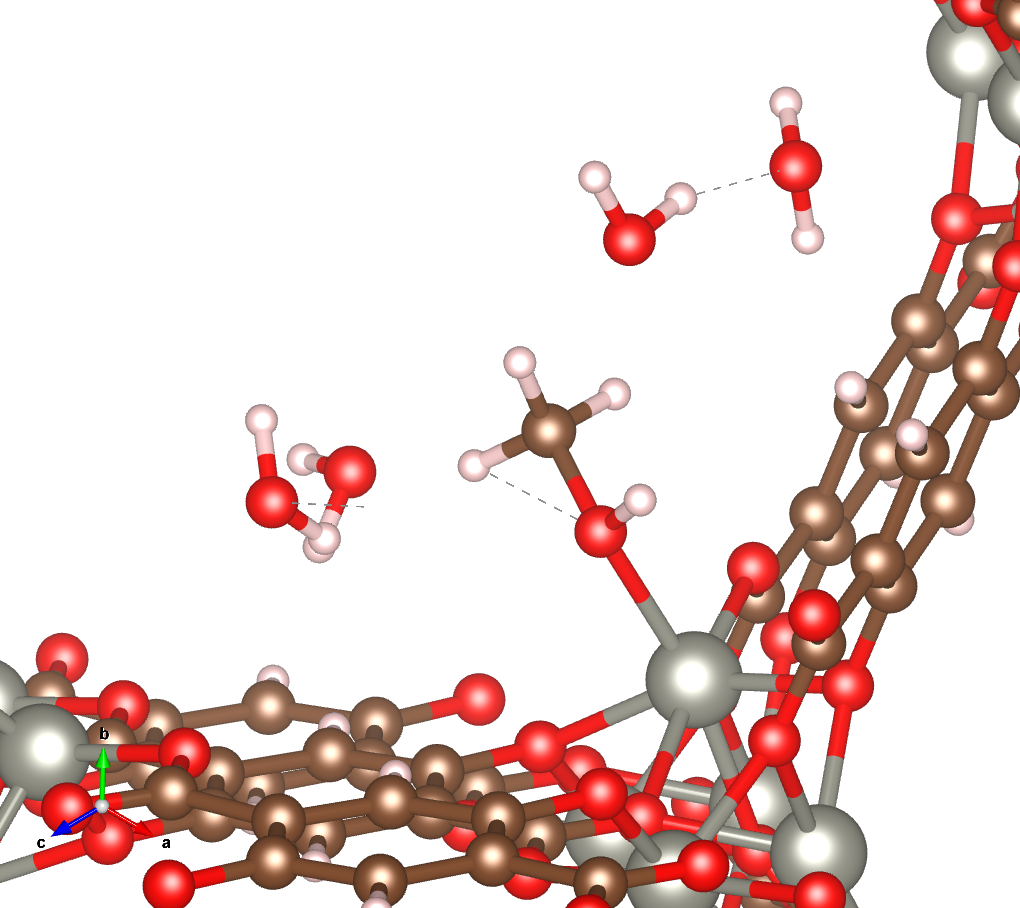

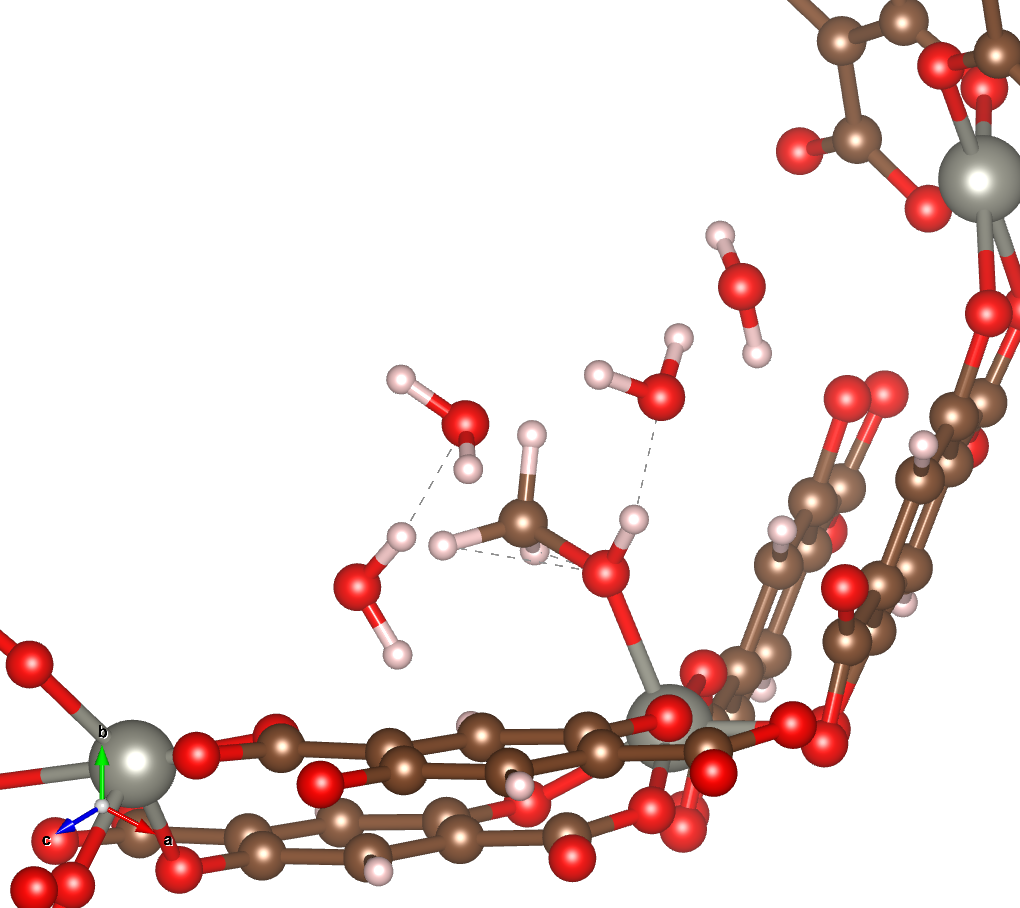

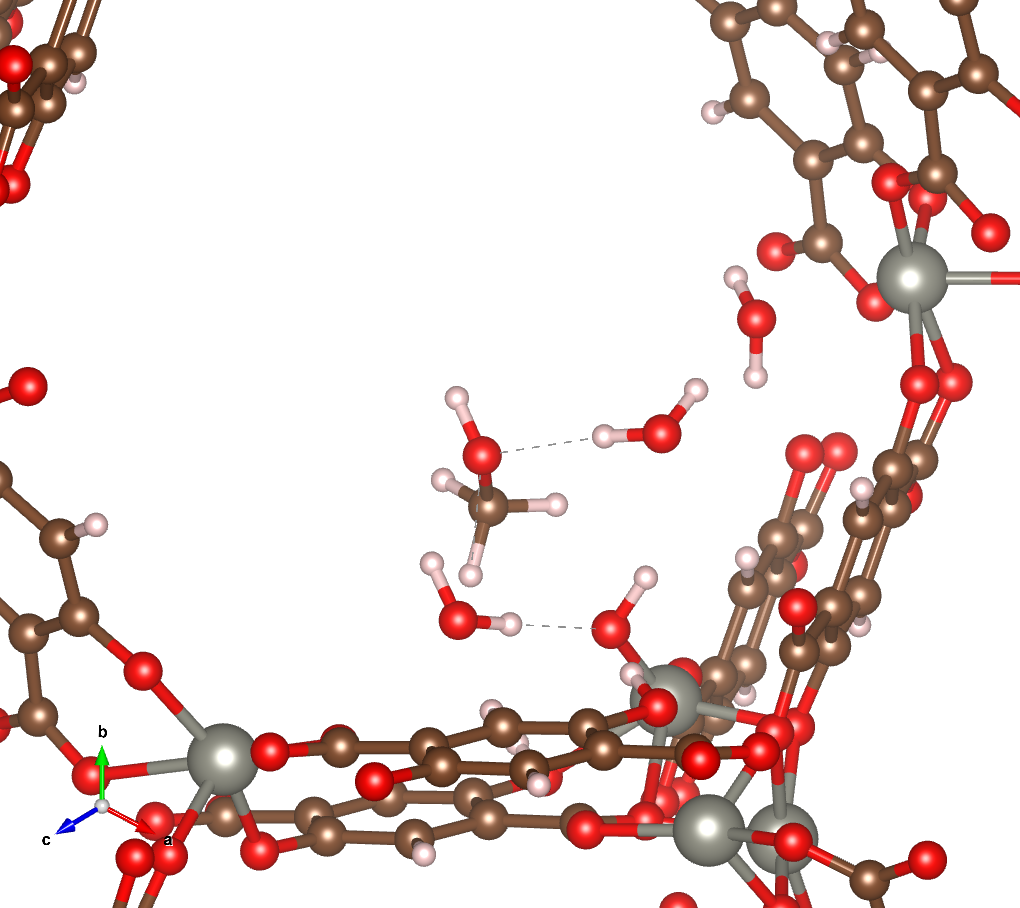

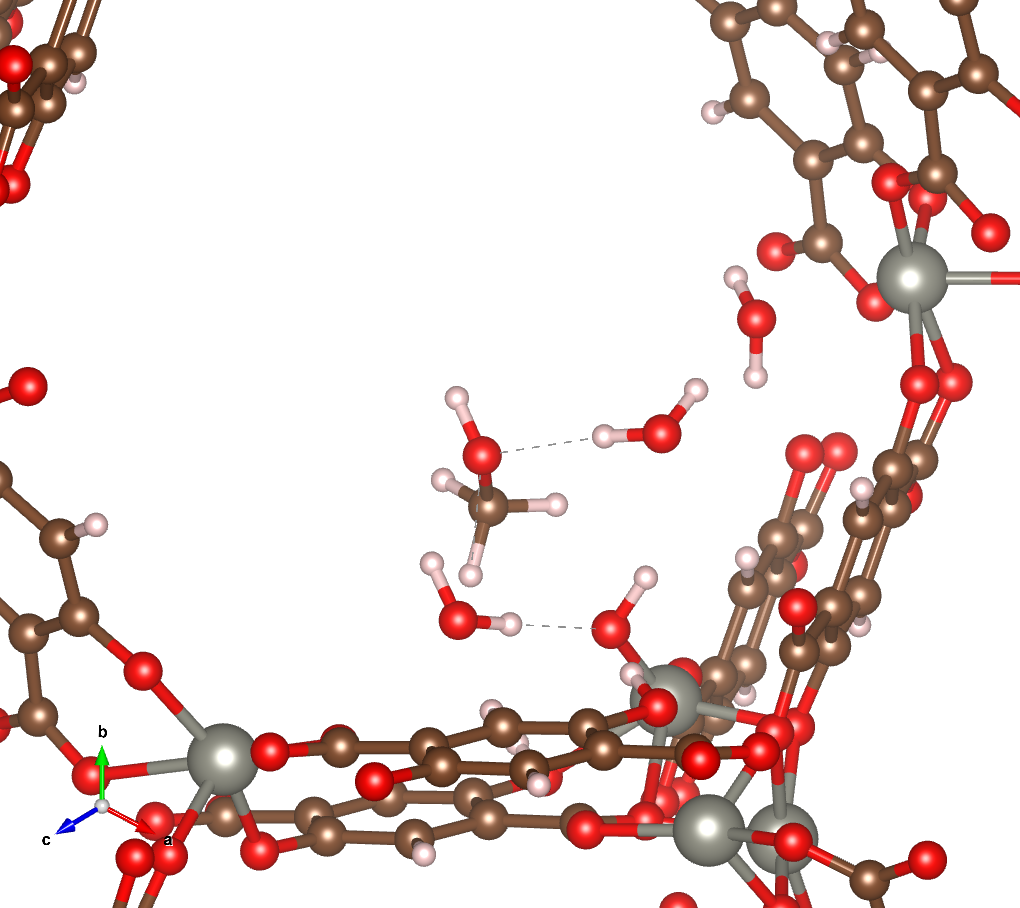

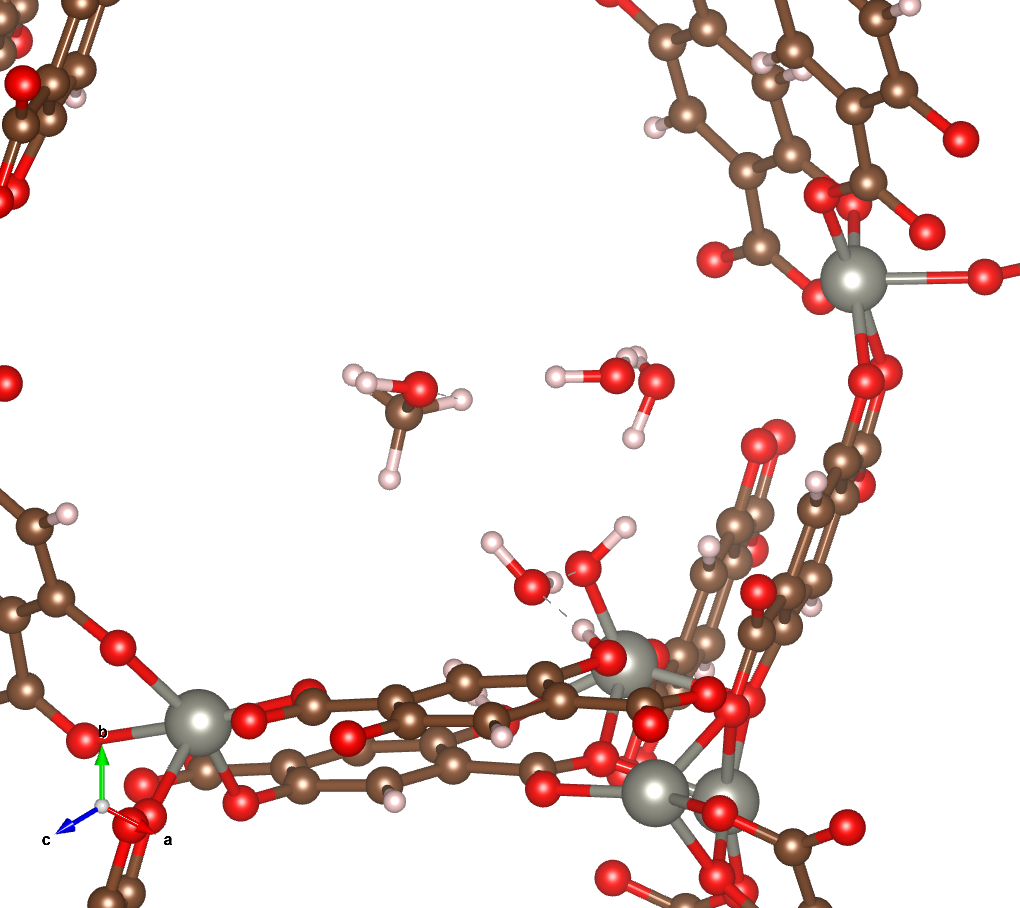


B) One H2O


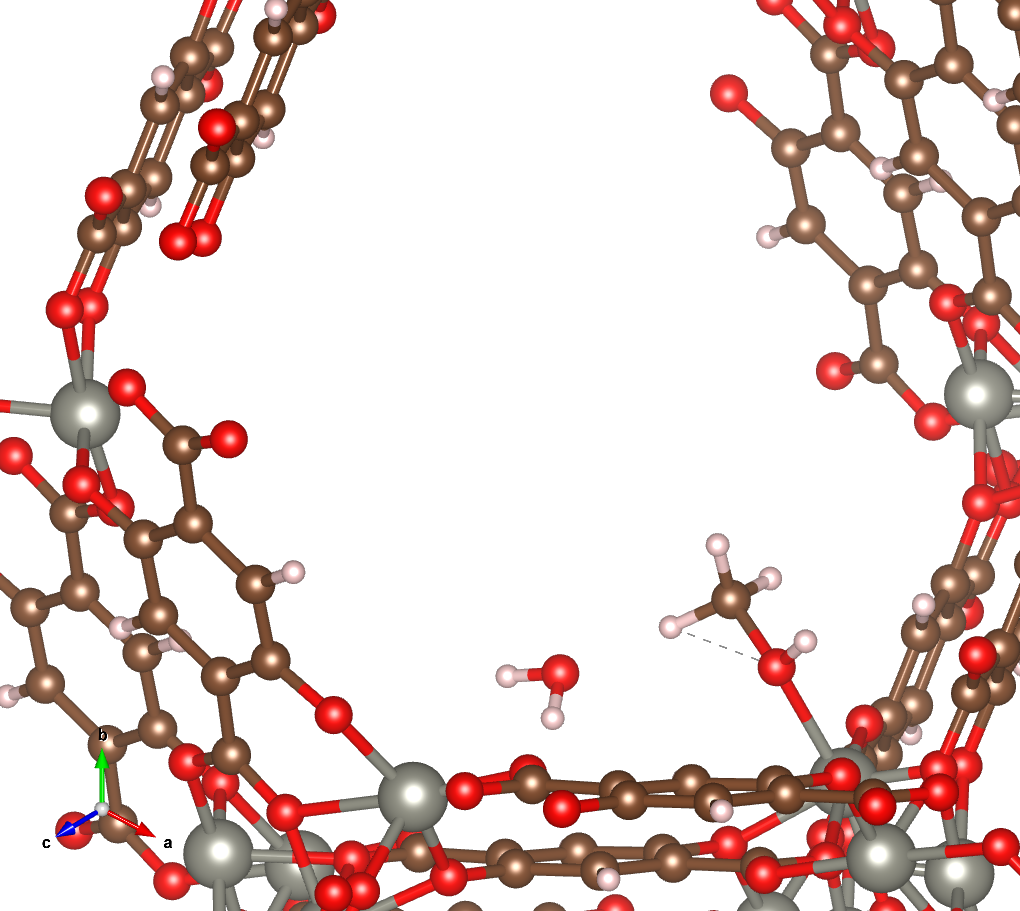

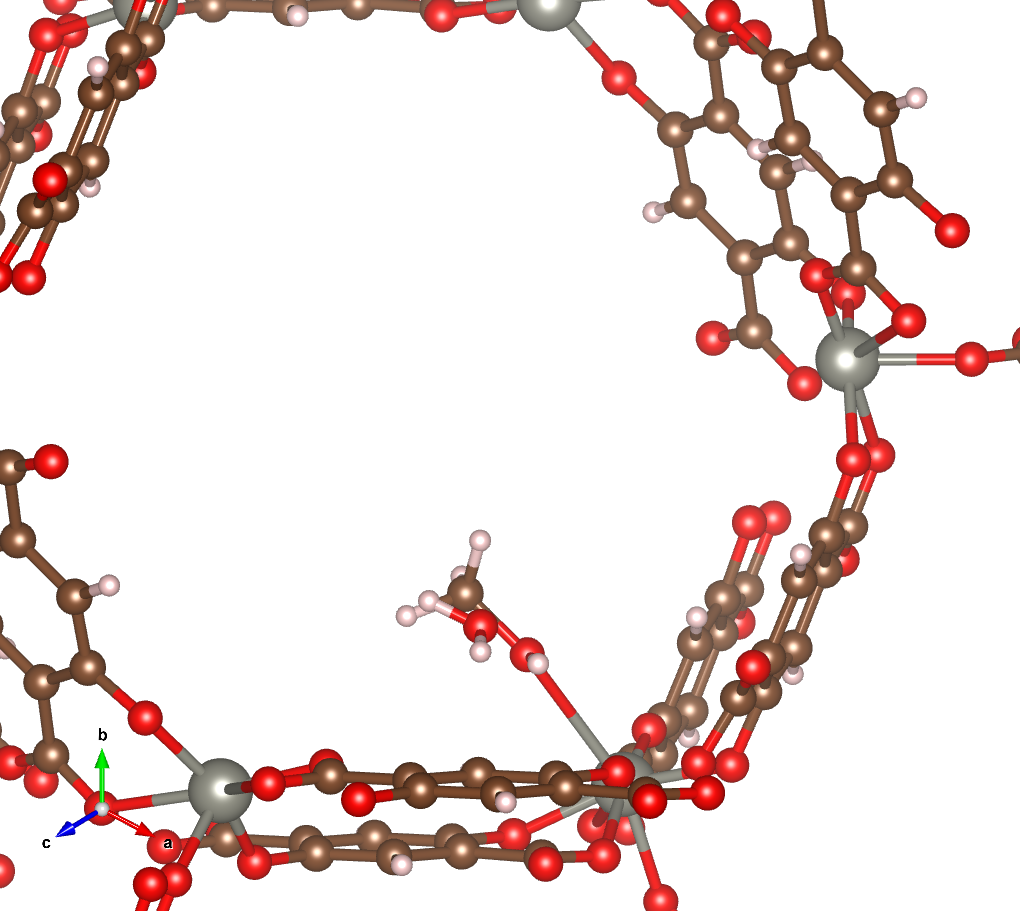

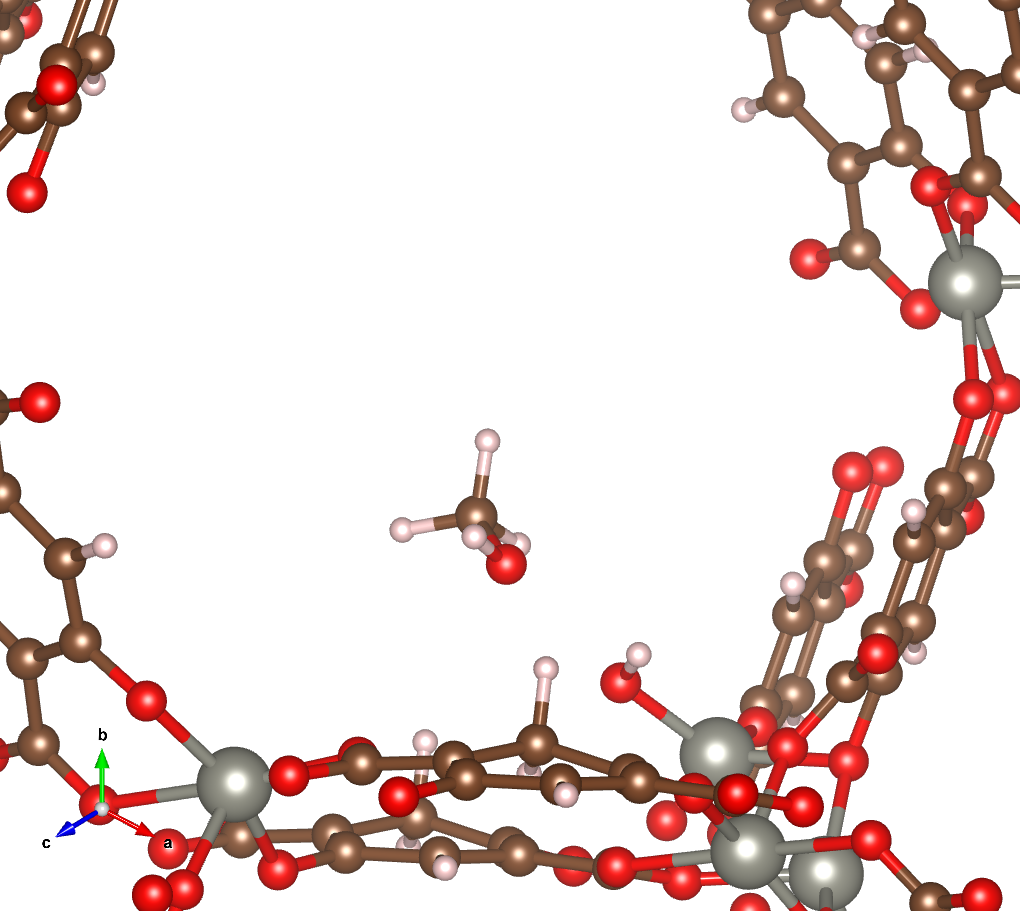

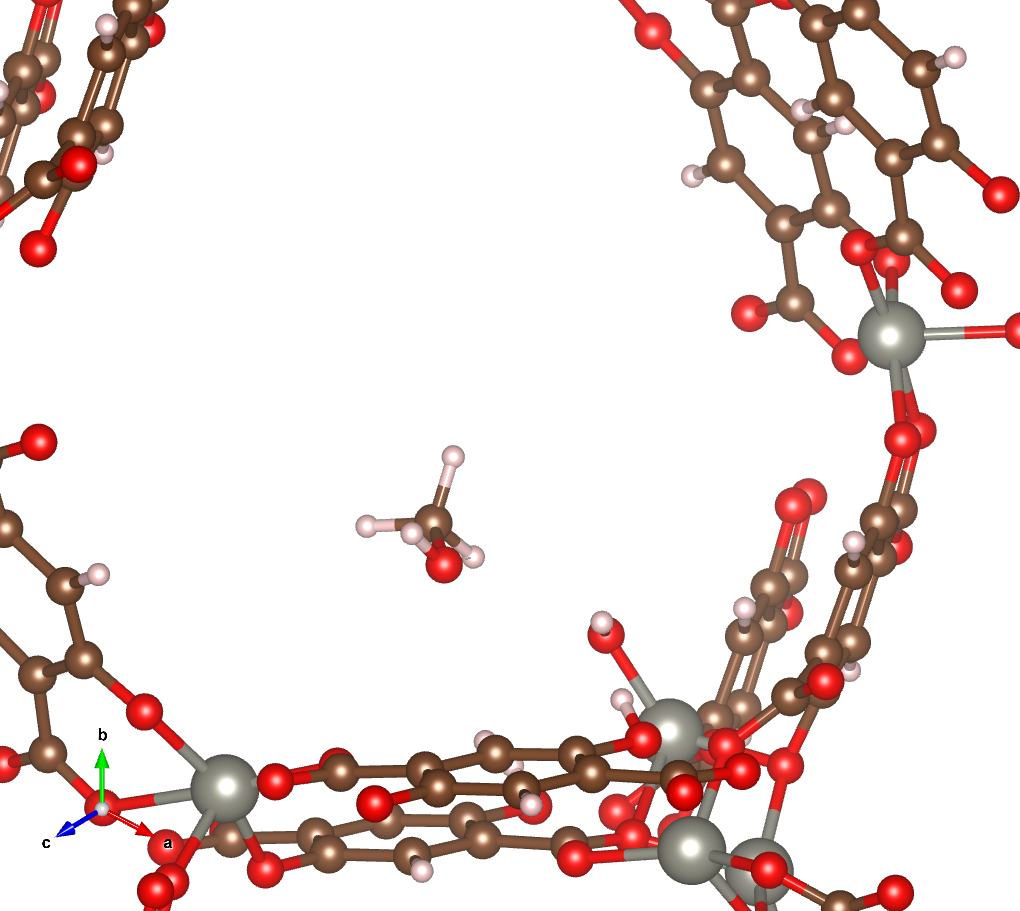

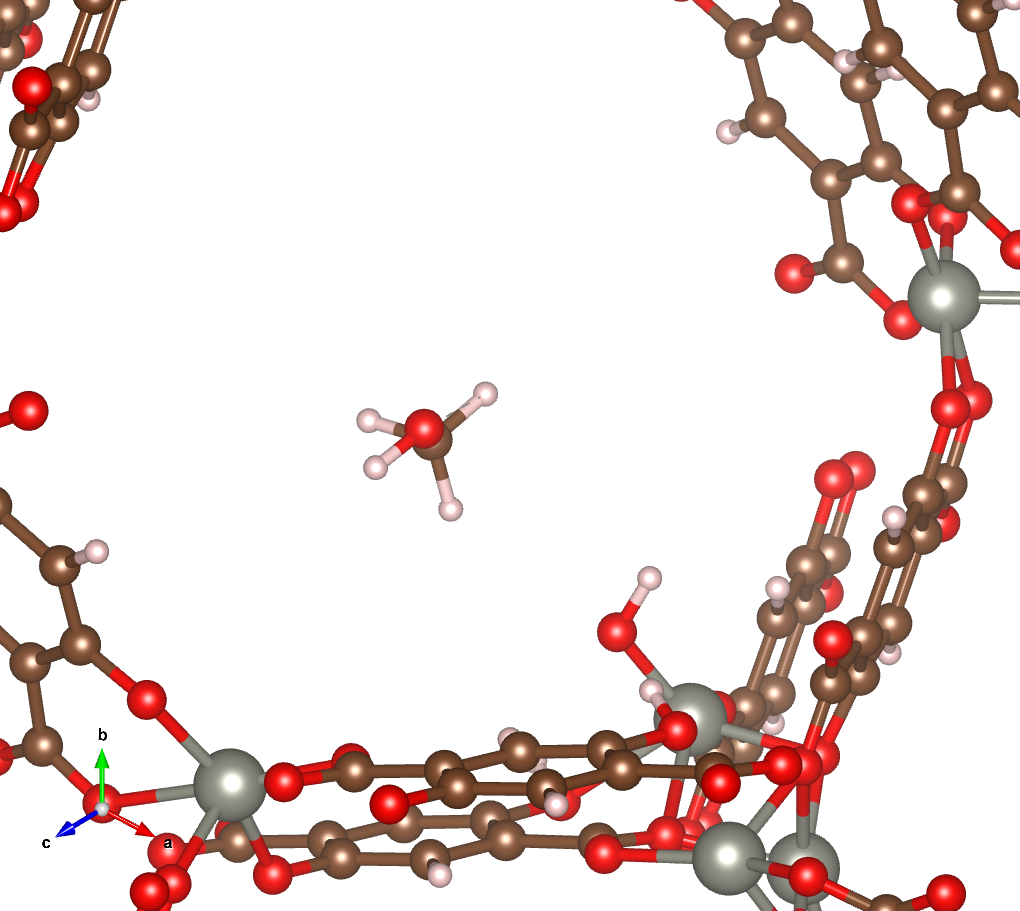


**Figure S4.** Schematic of the calculated reaction pathways for the single water and four water molecule simulations of MeOH dissociation.

Isopropanol, a secondary alcohol, was mixed with D2O and IR data is presented in Figure S5. At 150oC, a weak C–O stretch peak is observed at 1060 cm-1, namely at a frequency higher than in primary alcohols.3 That peak red shifts to 1057 cm-1 with increasing temperature, pointing to some interaction with the MOF. The 970 cm-1 peak is observed as well, indicating that D2O dissociates.4 In comparison to the dissociation reaction rates presented in Figure 1, IPA is found to effectively suppress water dissociation.

Carbon dioxide (CO2) has been used to quantify open metal sites in MOF-74 before and after water interaction. When metal sites of the MOF are occupied by OH groups, CO2 uptake is dramatically reduced.5 The CO2 uptake test was done in Zn-MOF-74 before and after the IPA/D2O reaction to verify that the steric impedance of IPA effectively hinders D2O dissociation, i.e. that no metal center is occupied by OH blockage after evacuation. The CO2 signal at 2340 cm-1 was observed and found to remain unchanged within error bars (~5%) after treatment that usually leads to reaction in pure D2O, suggesting no OD or OH occupies the metal sites from the D2O or IPA reaction with the MOF metal center after MOF evacuation as shown in Figure S6. Results suggest that the steric barrier of the IPA is an effective way to reduce water dissociation and desorption as a whole.


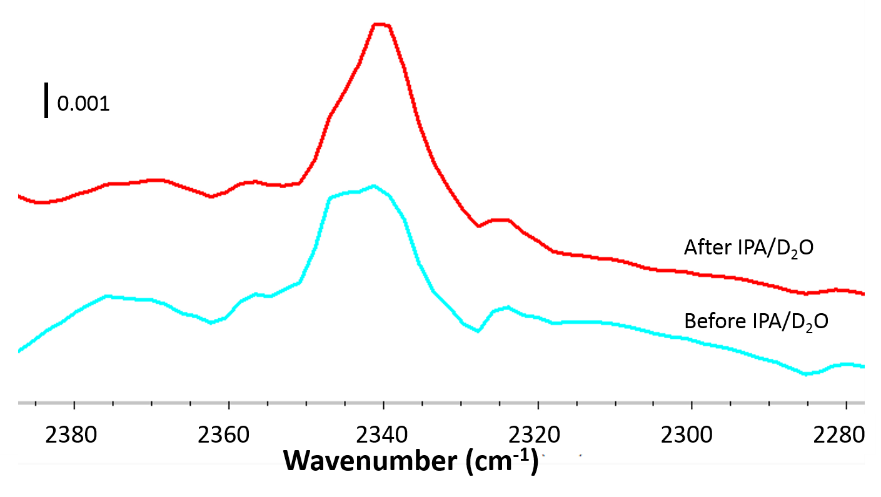


**Figure S6.** IR absorbance spectrum of CO2 uptake in Zn-MOF-74 before and after IPA/D2O treatment.


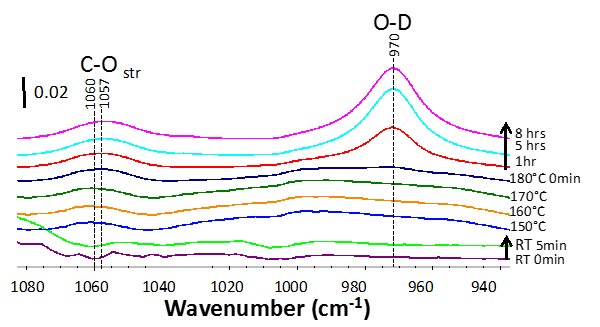


**Figure S5.** Absorbance IR spectrum of Zn-MOF-74 impregnated with isopropanol/D2O mixture as a function of temperature and time.

S6. Stability of Zn-MOF-74 after D2O/methanol, D2O/isopropanol exposure

**
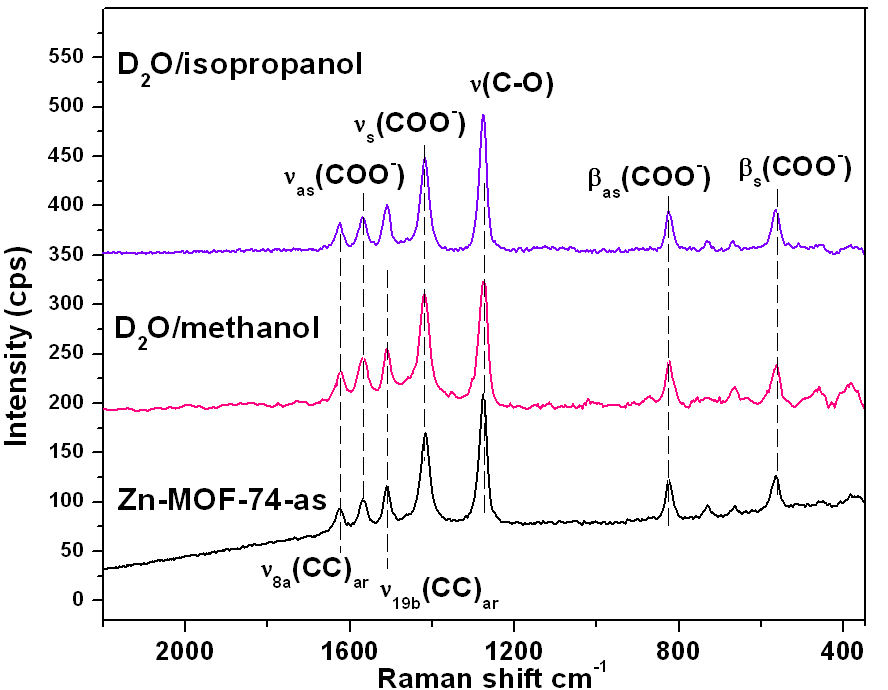
**

**Figure S7.** Raman spectra of Zn-MOF-74 in as-synthesized form, after D2O/methanol (8 Torr/8 Torr) and D2O/isopropanol (8 Torr/8 Torr) mixture exposure.

**References**

1. Nijem, N.; Canepa, P.; Kaipa, U.; Tan, K.; Roodenko, K.; Tekarli, S.; Halbert, J.; Oswald, I. W. H.; Arvapally, R. K.; Yang, C.; Thonhauser, T.; Omary, M. A.; Chabal, Y. J., Water Cluster Confinement and Methane Adsorption in the Hydrophobic Cavities of a Fluorinated Metal–Organic Framework. *Journal of the American Chemical Society* **2013,** 135, (34), 12615-12626.
2. Buck, U.; Huisken, F., Infrared spectroscopy of size-selected water and methanol clusters. *Chemical Reviews* **2000,** 100, (11), 3863-3890.
3. Falk, M.; Whalley, E., Infrared spectra of methanol and deuterated methanols in gas, liquid, and solid phases. *The Journal of Chemical Physics* **1961,** 34, (5), 1554-1568.
4. Linstrom, P. J.; Mallard, W., NIST Chemistry webbook; NIST standard reference database No. 69. **2001**.
5. Tan, K.; Zuluaga, S.; Gong, Q.; Canepa, P.; Wang, H.; Li, J.; Chabal, Y. J.; Thonhauser, T., Water Reaction Mechanism in Metal Organic Frameworks with Coordinatively Unsaturated Metal Ions: MOF-74. *Chemistry of Materials* **2014,** 26, (23), 6886-6895.
6. © 2018 by the authors. Submitted for possible open access publication under the
   terms and conditions of the Creative Commons Attribution (CC BY) license (http://creativecommons.org/licenses/by/4.0/).
